# Supplementary material for: Hybrid ZnO/MoS2 Core/Sheath Heterostructures for Photoelectrochemical Water Splitting
Source: MDPI journal article supplement (doi:10.3390/applnano2030012), 2021-07-07
Supplement: s1 [file s1]

## Supplementary Information for

# Hybrid ZnO/MoS<sub>2</sub> core/sheath heterostructures for photoelectrochemical water splitting

Katerina Govatsi <sup>1\*</sup>, Aspasia Antonelou <sup>1\*</sup>, Labrini Sygellou <sup>1</sup>, Stylianos G. Neophytides<sup>1</sup> and Spyros N. Yannopoulos <sup>1</sup>

<sup>1</sup> Foundation for Research and Technology, Hellas – Institute of Chemical Engineering Sciences (FORTH/ICE-HT), P.O. Box 1414, GR-26504, Rio–Patras, Greece

\* Correspondence: K.G.: [kat.govatsi@iceht.forth.gr](mailto:kat.govatsi@iceht.forth.gr); A.A.: [antonelou@iceht.forth.gr](mailto:antonelou@iceht.forth.gr), Tel.: +302610965252

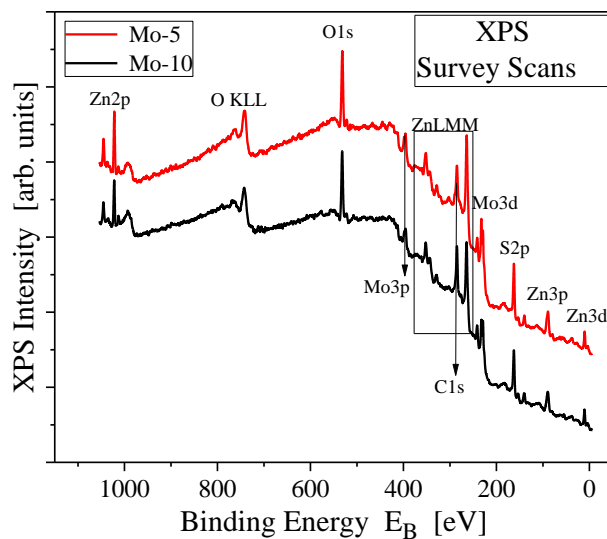

**Figure S1:** Surveys scans of the Mo-5 and Mo-10 MoS<sub>2</sub>/ZnO heterostructures.

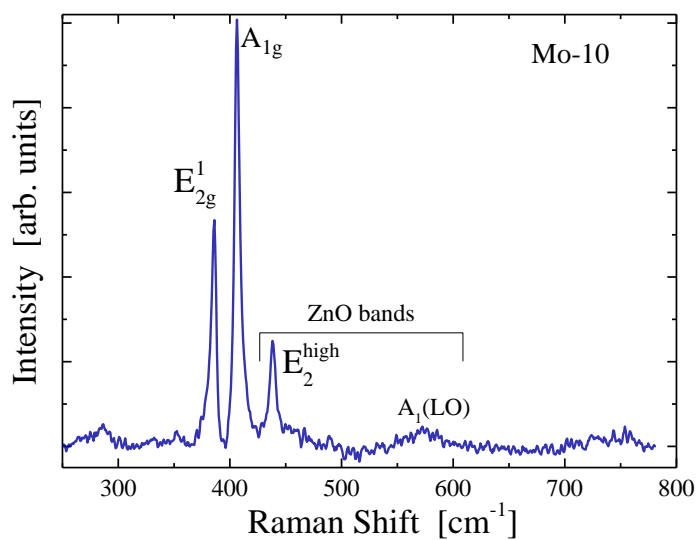

**Figure S2:** Representative full-range Raman spectrum of the Mo-10 sample.
